# Supplementary material
Source: PubMed Central journal article supplement (PMC3397241)
Supplement: NIHMS385763-supplement-01.pdf [file NIHMS385763-supplement-01.pdf]

## Supplemental Information

### Mechanism of Foreign DNA Selection in a Bacterial Adaptive Immune System

Dipali G. Sashital, Blake Wiedenheft, and Jennifer A. Doudna

#### Supplemental Information Inventory

Figure S1:

- a. Sequences of crRNA and DNA targets used in binding experiments (Figure 1b, 2c).
- b. Control experiment showing effect of adding excess CasA to Cascade dsDNA binding assays (Figure 1b,c 2c).
- c. Electrostatic surface map for CasA structure (Figure 1d).

Figure S2.

- a-c. Novel CRISPR constructs used for viral resistance assay shown in Figure 2a.
- d. Gel showing data quantified in Figure 2b.
- e-g. Controls showing that mutant CasA incorporates into Cascade at same levels as WT under conditions used in binding assays in Figure 2c.
- h. Control showing that Cascade binds dsDNA with incorrect PAM sequences (Figure 2c) mainly through non-specific interactions.

Figure S3.

More detailed look at periodic cleavage pattern observed in hydroxyl radical footprinting of the target strand (Figure 3a,c).

Figure S4.

Alignment of L1 regions of divergent CasA sequences. Figure is too large for main text.

Table S1.

List of plasmids and strains used in this study.

Table S2.

Measure  $K_d$  values plotted in Figure 2c,d.

**a**

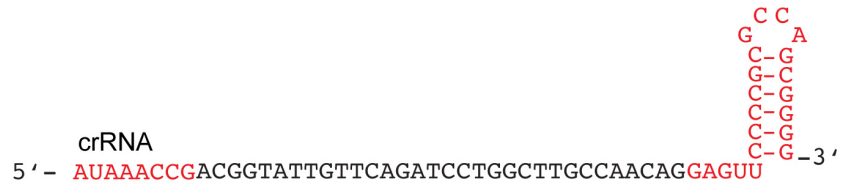

O1: WT target

5' - CATGAGGTCCTCGTTTAGTCTGTTGGCAAGCCAGGATCTGAACAATACCGT**CAT**CGGAGGTACGATCAAGG-3'

O2: WT non-target

5' - CCTTGATCGTACCTCCG**ATG**ACGGTATTGTTTCAGATCCTGGCTTGCCAACAGACTAAACGAGGACCTCATG-3'

O3: PAM mutant target

5' - CATGAGGTCCTCGTTTAGTCTGTTGGCAAGCCAGGATCTGAACAATACCGT**AGG**CGGAGGTACGATCAAGG-3'

O4: PAM mutant non-target

5' - CCTTGATCGTACCTCCG**CCT**ACGGTATTGTTTCAGATCCTGGCTTGCCAACAGACTAAACGAGGACCTCATG-3'

O5: Non-specific 1

5' - CATGAGGTCCTCGTTTAGTCTGCCATAACAAGTCTAGGACCGAACGGT**TGT**CATCGGAGGTACGATCAAGG-3'

O6: Non-specific 2

5' - CCTTGATCGTACCTCCG**ATG**ACAACCGTTCGGTCCTAGACTTGTATGGCAGACTAAACGAGGACCTCATG-3'

**b**

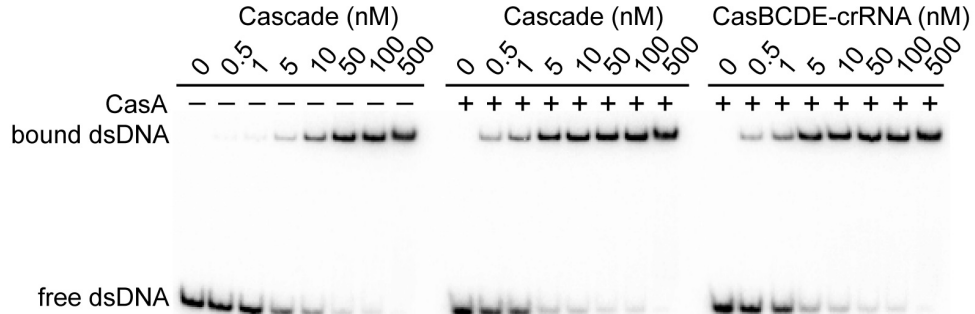

**c**

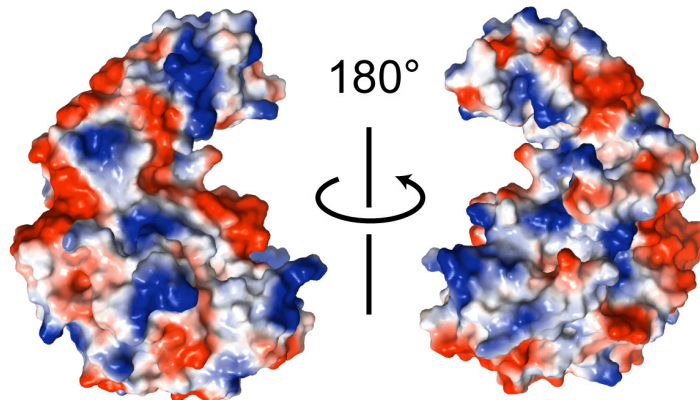

**Figure S1.** (a) RNA and DNA sequences used for binding assays. The crRNA generated from the CRISPR that was co-expressed with Cascade or CasBCDE protein subunits is shown at the top. For DNA sequences, PAM is in bold and proto-spacer is underlined. Proto-spacers on the target strands are complementary to the crRNA spacer, except for the non-specific DNAs, which contain the reverse of positions 1-31 of the proto-spacer. DNA oligonucleotides are referenced as O1 through O6 according to the nomenclature in this figure throughout the text. (b) Cascade binding O1—O2 dsDNA with and without supplemental CasA. In (+) lanes, excess CasA (2 $\mu$ M) was pre-incubated with either full Cascade or the CasBCDE-crRNA subcomplex prior to addition of dsDNA target. Cascade without supplemental CasA exhibits lower binding affinity for dsDNA, indicating that CasA dissociates from the complex at low concentrations. Full Cascade and CasBCDE-crRNA subcomplex in the presence of excess CasA bind dsDNA identically. (c) Electrostatic surface for CasA (blue = positive, red = negative). No prominent positive patches exist on the protein that could account for non-specific DNA binding. Figure S1 is related to main figure 1.



**Figure S2.** (a-c) CRISPR construct targeting lambda sequences within genes E, J, O and R containing PAMs. (a) Schematic of lambda genome showing location of proto-spacers. (b) Sequence of CRISPR. Repeat sequences are boxed with a black line, spacers are boxed in green. The CRISPR was synthesized by DNA 2.0, then cloned into pACYCDuet-1 between NcoI and XhoI restriction sites. (c) CRISPR transcription and pre-crRNA processing yields the four crRNAs shown at the bottom. PAMs are shown in bold on the target sequences. (d-g) Reconstitution of Cascade using exogenous CasA added to CasBCDE-crRNA (CasB-E) complex. (d) SDS-PAGE of Cascade pull-downs performed in low (100 mM) and high (500 mM) concentrations of NaCl. Normalized levels of CasA are shown in Figure 2b. (e) Purification of reconstituted Cascade by size exclusion chromatography. Overlay of chromatograms for WT CasA (blue), CasBCDE-crRNA (CasB-E) complex (red) and reconstituted Cascade (2:1 CasA:CasBCDE-crRNA, black) run on a Superose 6 column. (f) SDS-PAGE of co-expressed and purified Cascade and CasBCDE-crRNA (CasB-E) complexes compared with reconstituted WT, F129A and N131A CasA + CasBCDE-crRNA. (g) Bar graph plotting amounts of CasA relative to CasC as detected by SDS-PAGE, normalized to relative amount of CasA for co-expressed Cascade. (h) Gel shift assay showing CasA+CasBCDE-crRNA (CasB-E) binding to O3—O4 dsDNA containing the correct proto-spacer sequence but incorrect PAM in the absence or presence of 1  $\mu$ M non-specific competitor O5—O6 dsDNA (Fig. S1a). Figure S2 is related to main figure 2.

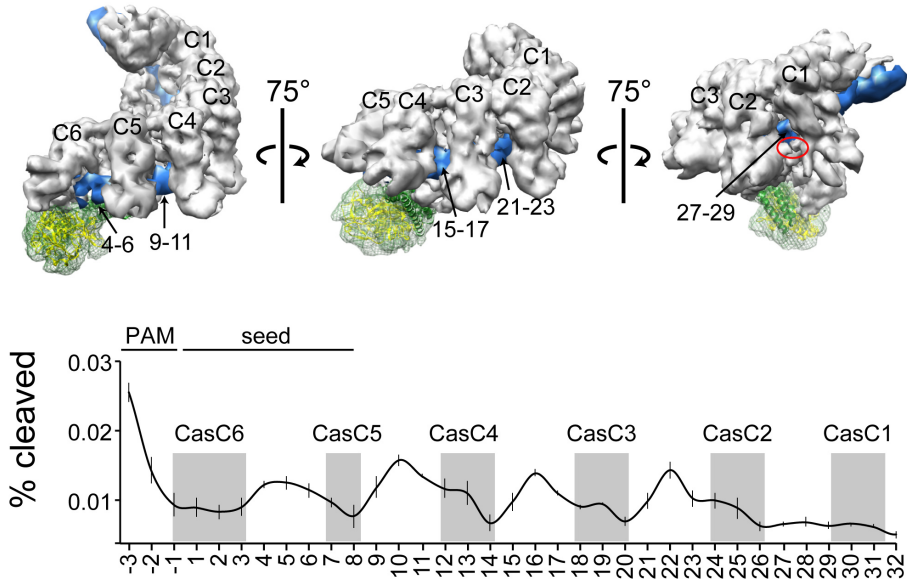

**Figure S3.** Periodic hydroxyl radical cleavage of the target DNA strand is observed between CasC subunits, indicating that each CasC subunit protects ~3 nt. Cascade is colored as in Figure 1. Extra density (red circle) is observed between CasC1 and C2, which may lead to protection of nucleotides 27-29. Figure S3 is related to main figure 3.



groups of sequences used for the alignments. A pairwise alignment of the *E. coli* and *T. thermophilus* sequences was used to identify similar residues in L1 for mutational analysis. Residues between 129 and 131 vary in divergent CasA sequences, but an aromatic residue (usually Phe) is present at nearly the same location. This three amino acid motif generally contains another hydrophobic residue and a polar residue at the third position. Figure S4 is related to main figure 4.



**Table S1: Plasmids and strains used in this study**

| Plasmids | Name                | Description                                                                                                          | Source         |
|----------|---------------------|----------------------------------------------------------------------------------------------------------------------|----------------|
| 1        | TtCasA-pSV272       | <i>T. thermophilus</i> casA expression vector with N-terminal His <sub>6</sub> -MBP-TEV site tag                     | This study     |
| 2        | EcCasA-pSV272       | <i>E. coli</i> casA expression vector with N-terminal His <sub>6</sub> -MBP-TEV site tag                             | This study     |
| 3        | EcCasA F129A-pSV272 | <i>E. coli</i> F129A casA expression vector with N-terminal His <sub>6</sub> -MBP-TEV site tag                       | This study     |
| 4        | EcCasA V130A-pSV272 | <i>E. coli</i> V130A casA expression vector with N-terminal His <sub>6</sub> -MBP-TEV site tag                       | This study     |
| 5        | EcCasA N131A-pSV272 | <i>E. coli</i> N131A casA expression vector with N-terminal His <sub>6</sub> -MBP-TEV site tag                       | This study     |
| 6        | pWUR404             | casE in pCDF-1b expression vector, no tags                                                                           | (Brouns, 2007) |
| 7        | pWUR408             | casA in pRSF-1b expression vector, no tags                                                                           | (Brouns, 2007) |
| 8        | pWUR480             | casB with N-terminal Strep-tag II, casC, casD in pET52b expression vector                                            | (Brouns, 2007) |
| 9        | pWUR547             | <i>E. coli</i> R44 CRISPR, 7x spacer number 2 in pACYCDuet-1 expression vector                                       | (Brouns, 2007) |
| 10       | JOE-CRISPR-DNA      | CRISPR targeting PAM-adjacent regions in lambda genes J, O, R and E in pACYCDuet-1 expression vector, Figure S2a-c   | This study     |
| 11       | pWUR477             | Non-targeting CRISPR in pACYCDuet-1                                                                                  | (Brouns, 2007) |
| 12       | pWUR478             | CRISPR targeting regions in lambda genes J, O, R and E with incorrect PAM sequences in pACYCDuet-1 expression vector | (Brouns, 2007) |
| 13       | pWUR397             | cas3 in pRSF-1b expression vector, no tags                                                                           | (Brouns, 2007) |
| 14       | pWUR400             | casA-casB-casC-casE in pCDF-1b expression vector, no tags                                                            | (Brouns, 2007) |
| 15       | pWUR400 N126A       | casA with N126A mutation, casB-casC-casE in pCDF-1b expression vector, no tags                                       | This study     |
| 16       | pWUR400 F129A       | casA with F129A mutation, casB-casC-casE in pCDF-1b expression vector, no tags                                       | This study     |
| 17       | pWUR400 V130A       | casA with V130A mutation, casB-casC-casE in pCDF-1b expression vector, no tags                                       | This study     |
| 18       | pWUR400 N131A       | casA with N131A mutation, casB-casC-casE in pCDF-1b expression vector, no tags                                       | This study     |
| 19       | pWUR400 Q132A       | casA with Q132A mutation, casB-casC-casE in pCDF-1b expression vector, no tags                                       | This study     |
| 20       | pWUR400 Q135A       | casA with Q135A mutation, casB-casC-casE in pCDF-1b expression vector, no tags                                       | This study     |

| Strains | <i>E. coli</i> host | Purpose                                     | Plasmid 1 | Plasmid 2 | Plasmid 3 | Plasmid 4 |
|---------|---------------------|---------------------------------------------|-----------|-----------|-----------|-----------|
| 1       | BL21 AI             | Viral resistance assay WT                   | 10        | 13        | 14        | --        |
| 2       | BL21 AI             | Viral resistance assay non-targeting CRISPR | 11        | 13        | 14        | --        |
| 3       | BL21 AI             | Viral resistance assay incorrect PAM CRISPR | 12        | 13        | 14        | --        |
| 4       | BL21 AI             | Viral resistance assay N126A CasA           | 10        | 13        | 15        | --        |
| 5       | BL21 AI             | Viral resistance assay F129A CasA           | 10        | 13        | 16        | --        |
| 6       | BL21 AI             | Viral resistance assay V130A CasA           | 10        | 13        | 17        | --        |
| 7       | BL21 AI             | Viral resistance assay N131A CasA           | 10        | 13        | 18        | --        |
| 8       | BL21 AI             | Viral resistance assay Q132A CasA           | 10        | 13        | 19        | --        |
| 9       | BL21 AI             | Viral resistance assay Q135A CasA           | 10        | 13        | 20        | --        |
| 10      | BL21(DE3)           | Cascade expression                          | 6         | 7         | 8         | 9         |
| 11      | BL21(DE3)           | CasBCDE-crRNA expression                    | 6         | 8         | 9         | --        |

**Table S2:** Measured  $K_d$  (nM) values

|                                  | dsDNA     | ssDNA       |
|----------------------------------|-----------|-------------|
| WT                               | 1.4 ± 0.2 | 0.25 ± 0.01 |
| <i>CasA mutants, correct PAM</i> |           |             |
| F129A                            | 720 ± 120 | 1.1 ± 0.2   |
| V130A                            | 12 ± 1    | 0.44 ± 0.11 |
| N131A                            | 93 ± 5    | 1.0 ± 0.1   |
| <i>WT CasA, incorrect PAM</i>    |           |             |
| Fully incorrect                  | 310 ± 70  | 0.55 ± 0.03 |
| Target strand incorrect          | 320 ± 80  | NA          |
| Non-target strand incorrect      | 20 ± 3    | NA          |

### Supplemental References

Altschul, S.F., Gish, W., Miller, W., Myers, E.W., and Lipman, D.J. (1990). Basic local alignment search tool. *J Mol Biol* 215, 403-410.

Brouns, S.J., Jore, M.M., Lundgren, M., Westra, E.R., Slijkhuis, R.J., Snijders, A.P., Dickman, M.J., Makarova, K.S., Koonin, E.V., and van der Oost, J. (2008). Small CRISPR RNAs guide antiviral defense in prokaryotes. *Science* 321, 960-964.

Jones, D.T. (1999). Protein secondary structure prediction based on position-specific scoring matrices. *J Mol Biol* 292, 195-202.

Larkin, M.A., Blackshields, G., Brown, N.P., Chenna, R., McGettigan, P.A., McWilliam, H., Valentin, F., Wallace, I.M., Wilm, A., Lopez, R., *et al.* (2007). Clustal W and Clustal X version 2.0. *Bioinformatics* 23, 2947-2948.
